# Supplementary material
Source: PubMed Central journal article supplement (PMC5666376)
Supplement: toxins-09-00329-s001.pdf [file toxins-09-00329-s001.pdf]

# Supplementary Materials: Production, Characterisation and Testing of an Ovine Antitoxin against Ricin; Efficacy, Potency and Mechanisms of Action

Sarah J. C. Whitfield, Gareth D. Griffiths, Dominic C. Jenner, Robert J. Gwyther, Fiona M. Stahl, Lucy J. Cork, Jane L. Holley, A. Christopher Green and Graeme C. Clark

**Table S1. Scoring of observable signs of ricin intoxication in the mouse.** Signs of intoxication, including piloerection, immobility, and abdominal pinching, were scored according to the descriptions in the tables. For the numerical scores recorded in the main figures, the sum of the piloerection and mobility and the abdominal pinching scores was used. Animals reaching a score of 5 on the piloerection and mobility scale were humanely killed.

| <b>Visible Signs of Intoxication:<br/>Piloerection and Mobility</b> | <b>Score</b>         | <b>Visible Signs of Intoxication:<br/>Abdominal Pinching</b> | <b>Score</b> |
|---------------------------------------------------------------------|----------------------|--------------------------------------------------------------|--------------|
| None + normal mobility                                              | 0                    | Normal animal–no pinch                                       | 0            |
| Mild piloerection + normal mobility                                 | 1                    | Mild abdominal pinch                                         | 1            |
| Medium piloerection + normal mobility                               | 2                    | Medium abdominal pinch                                       | 2            |
| Severe piloerection + normal mobility                               | 3                    | Severe abdominal pinch                                       | 3            |
| Severe piloerection + not wanting to<br>move/reduced mobility       | 4                    |                                                              |              |
| Severe piloerection + unable to move                                | 5 (humane end point) |                                                              |              |
